# Supplementary material for: Cell death–associated lipid droplet protein CIDE-A is a noncanonical marker of endoplasmic reticulum stress
Source: PubMed Central journal article supplement (PMC8119190; doi:10.1172/jci.insight.143980), 2021-04-08
Supplement: jciinsight-6-143980-s217.pdf [file jciinsight-6-143980-s217.pdf]

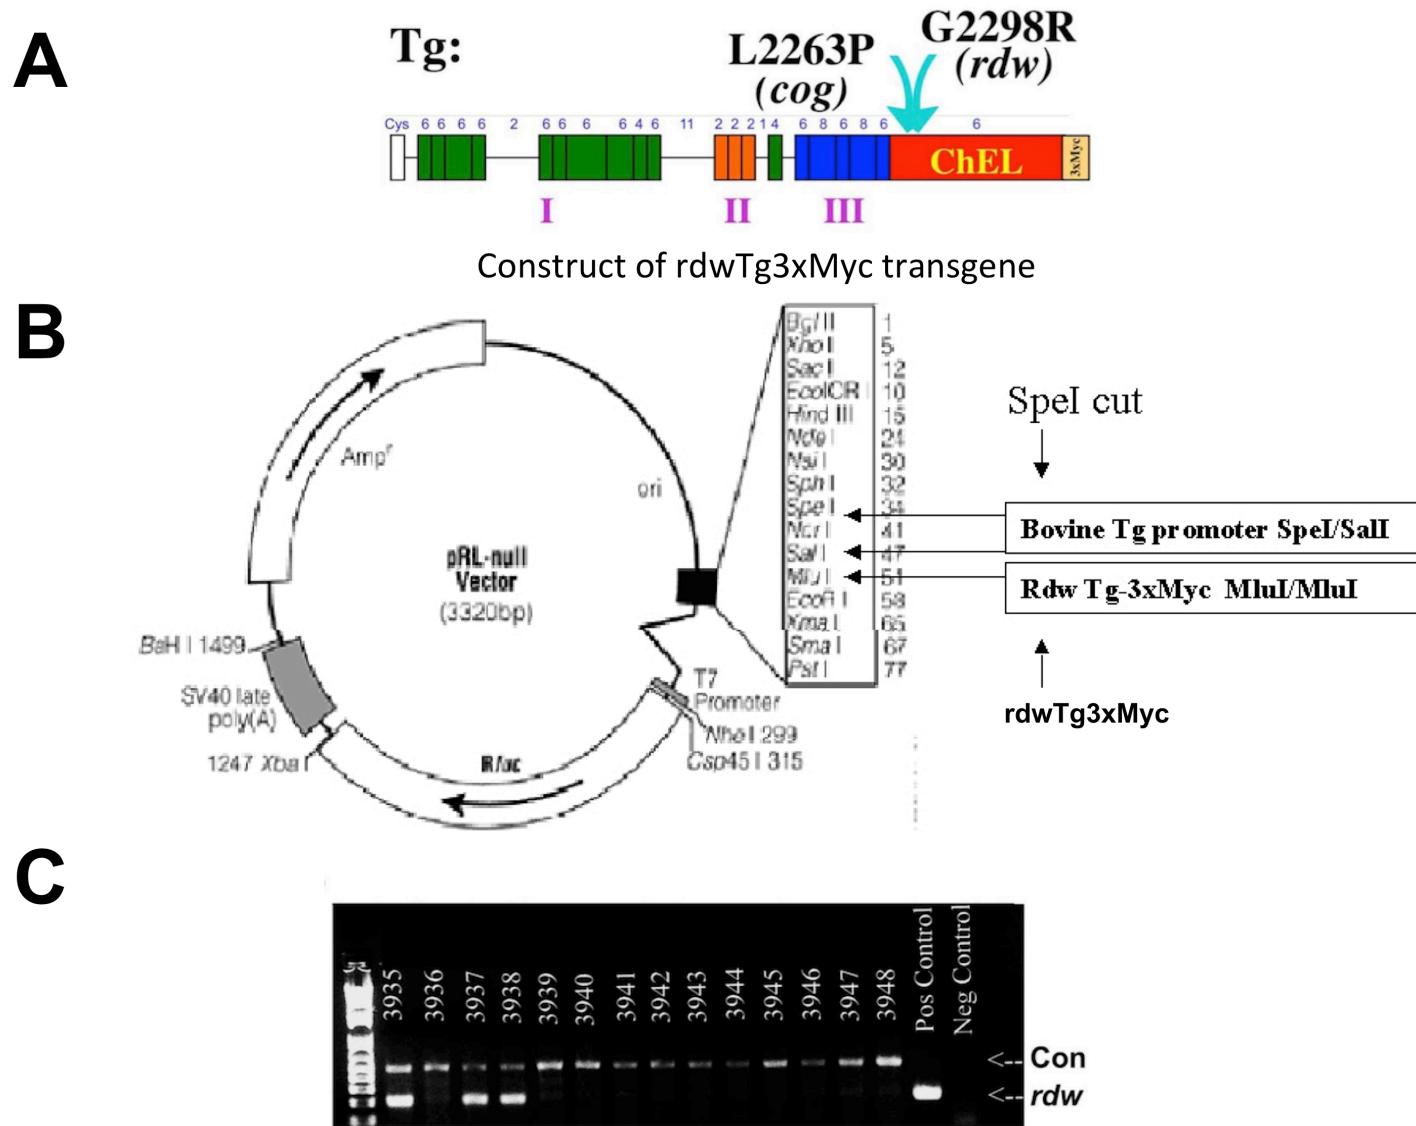

Morishita et al., SI Fig. S1

**Figure S1. Generation of  $TG^{cog/cog}$  mice bearing a  $TG^{rdw}$  transgene.** **A.** Depiction of the Tg primary structure, indicating regions I, II, III, ChEL domain, and the location of a triple-myc epitope tag at the C-terminus. The positions of *cog* and *rdw* mutations within the Tg-ChEL domain are indicated. **B.** Construction of a plasmid bearing the bovine *TG* promoter followed by the ORF encoding *rdw*-Tg-3xMyc. **C.** PCR identification of the  $TG^{rdw}$  transgene specified by a 284 bp PCR fragment amplified from genomic DNA; a 500 bp beta-actin amplicon was included as an internal control (Con) for the PCR reaction.

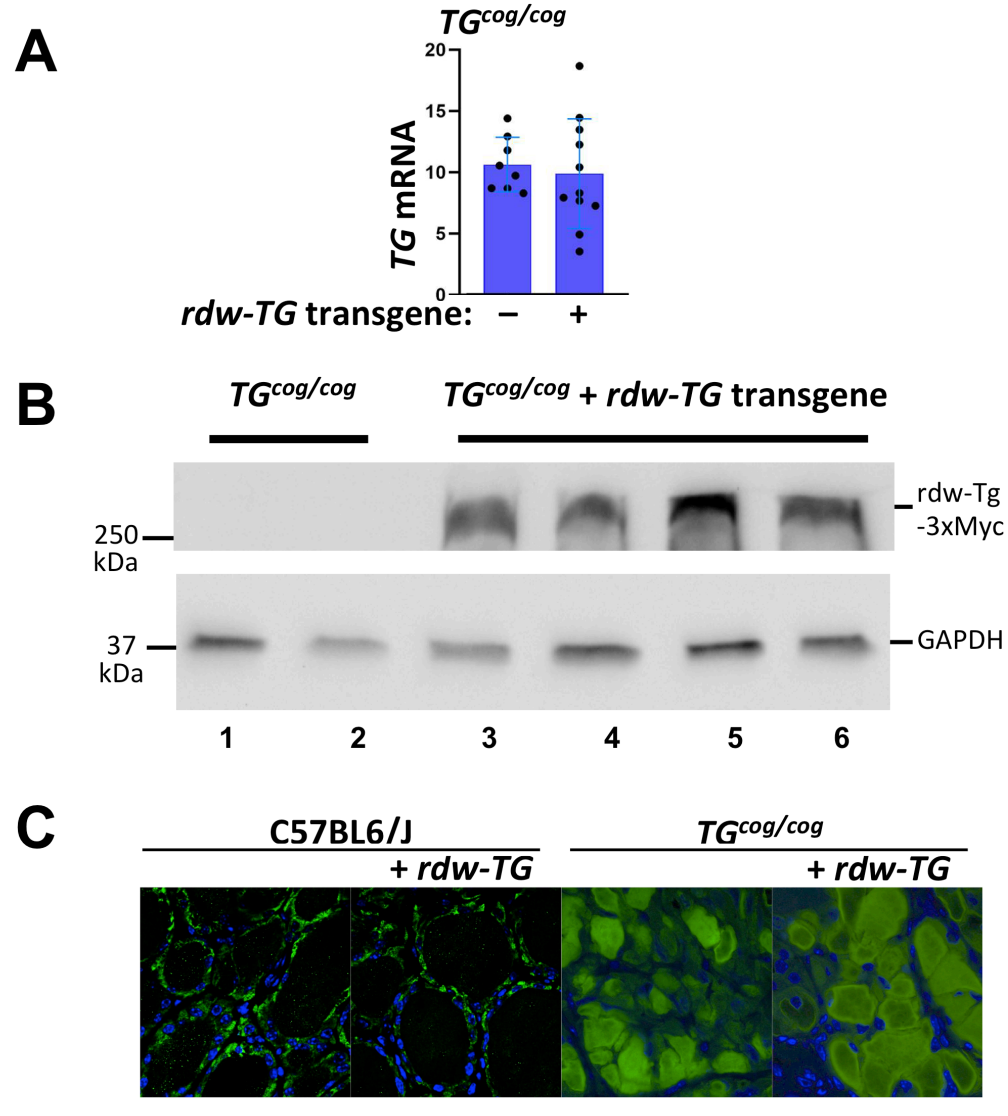

Morishita et al., SI Fig. S2

**Figure S2. Characterization of the thyroid gland of  $TG^{cog/cog}$  mice bearing the  $TG^{rdw}$  transgene.** **A.** Total  $TG$  mRNA in the thyroid gland of  $TG^{cog/cog}$  mice lacking or bearing the  $TG^{rdw}$  transgene, normalized to housekeeping RNA  $\pm$  s.d.. **B.** Western blot detection of  $rdw-Tg-3xMyc$  in  $TG^{cog/cog}$  mice bearing the  $TG^{rdw}$  transgene, and nontransgenic controls. GAPDH is a loading control. **C.** BiP immunofluorescence in the thyroid glands of 2 month-old control mice lacking or bearing the  $TG^{rdw}$  transgene, or  $TG^{cog/cog}$  mice lacking or bearing the  $TG^{rdw}$  transgene (magnification identical in all four panels; but the ER is vastly swollen in  $TG^{cog/cog}$  mice).



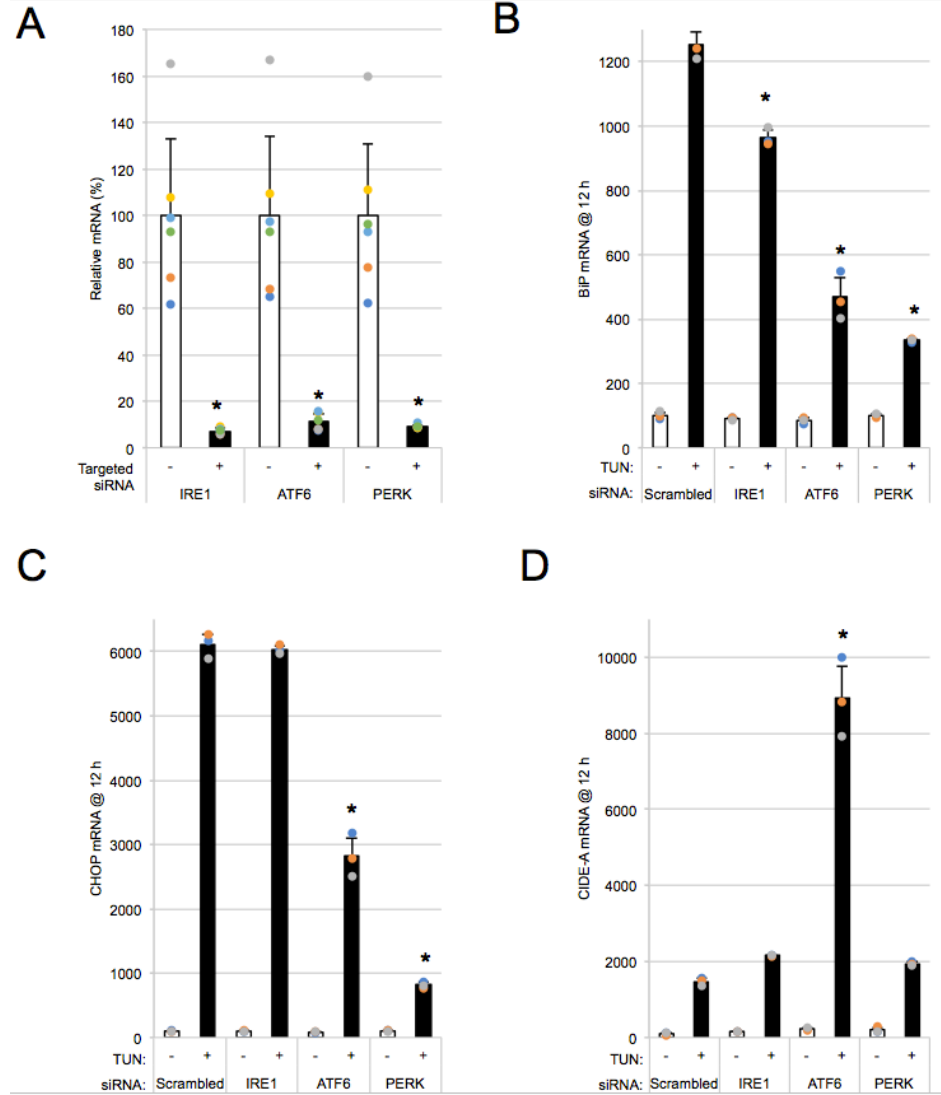

**Figure S4. Acute ER stress response after siRNA-mediated knockdown of IRE1, ATF6, or PERK in PCCL3 cells.** Replicate wells of PCCL3 were transfected with 30 nM siRNA duplexes for knockdown of IRE1, ATF6, or PERK, or scrambled/noncoding oligos. At 24 h after oligofection, the cells were treated  $\pm$  TUN (0.1  $\mu$ g/mL). After an additional 12 h, all cells were lysed, and mRNA levels were measured by q-rtPCR for IRE1, ATF6 and PERK (**panel A**; \*  $p < 0.05$  versus scrambled oligo), BiP (**panel B**), CHOP (**panel C**), and CIDE-A (**panel D**). The data show the mean (from three biological replicates)  $\pm$  s.d in a single experiment; \*  $p < 0.05$  versus TUN-treated cells transfected with scrambled oligo (*decreased* for BiP and CHOP; *increased* for CIDE-A).

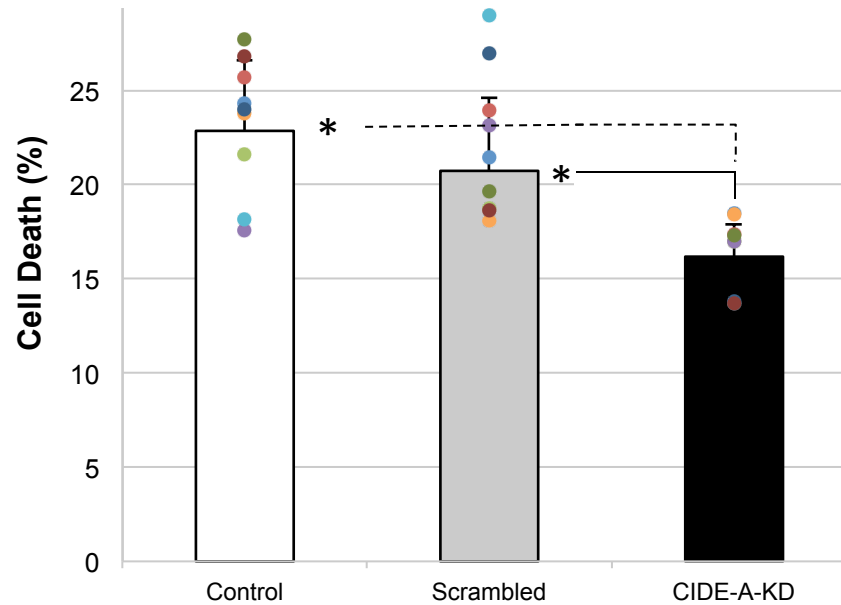

**Figure S5. Cell death limited by siRNA-mediated knockdown of CIDE-A.** Each set of cells were either untransfected (Control) or transfected with Scrambled or siRNA-mediated knockdown of endogenous CIDE-A (CIDE-A-KD). All cells were treated with DOX (for the full 3 d) to induce CIDE-A-myc (as in Fig. 7) plus TUN (0.1  $\mu\text{g}/\text{mL}$  for the last 2 d) to induces ER stress. At 3 d, cell death was quantified in all samples; cell death was limited by CIDE-A-KD; the data represent the mean (from three independent experiment in which each experimental sample had three biological replicates)  $\pm$  s.d.; \*  $p < 0.05$  versus samples without CIDE-A-KD.

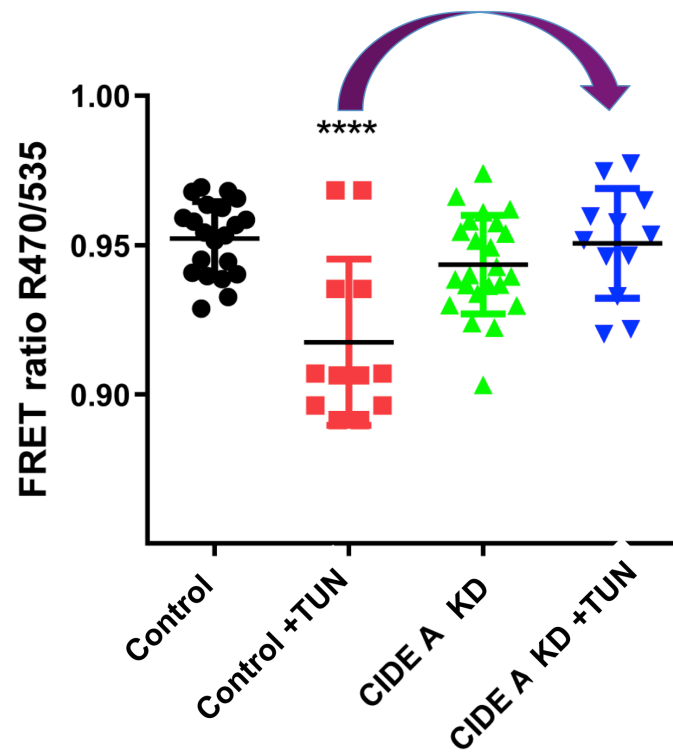

### Morishita et al., SI Fig. S6

**Figure S6. ER stress effect on ER calcium level in PCCL3 thryocytes.** One day after plating, PCCL3 cells were transfected with Lipofectamine bearing either 10 nM scrambled oligo (*left-two set of samples*) or siRNA for knockdown of CIDE-A (*right-two set of samples*). Thereafter, all sets of cells were plasmid-transfected (Viafect transfection reagent) to express D4ER in pCDNA3.1. One half of each set of cells were challenged with TUN (0.1  $\mu\text{g}/\text{mL}$ ), or vehicle alone. At 48 h after TUN addition, transfected cells were washed in PBS plus 2 mM  $\text{MgCl}_2$  and 5.5 mM glucose, and underwent fluorescence imaging and FRET analysis using 430 nm excitation and 470/535 nm ratiometric emission. The FRET ratio shown for each cell (acquired using Metafluor) reflects the relative  $\text{Ca}^{++}$  level in the ER; a lower ratio signifies lower ER calcium. Each point reflects a single cell from a representative experiment (of four independent FRET experiments); mean values  $\pm$  s.d. are shown.

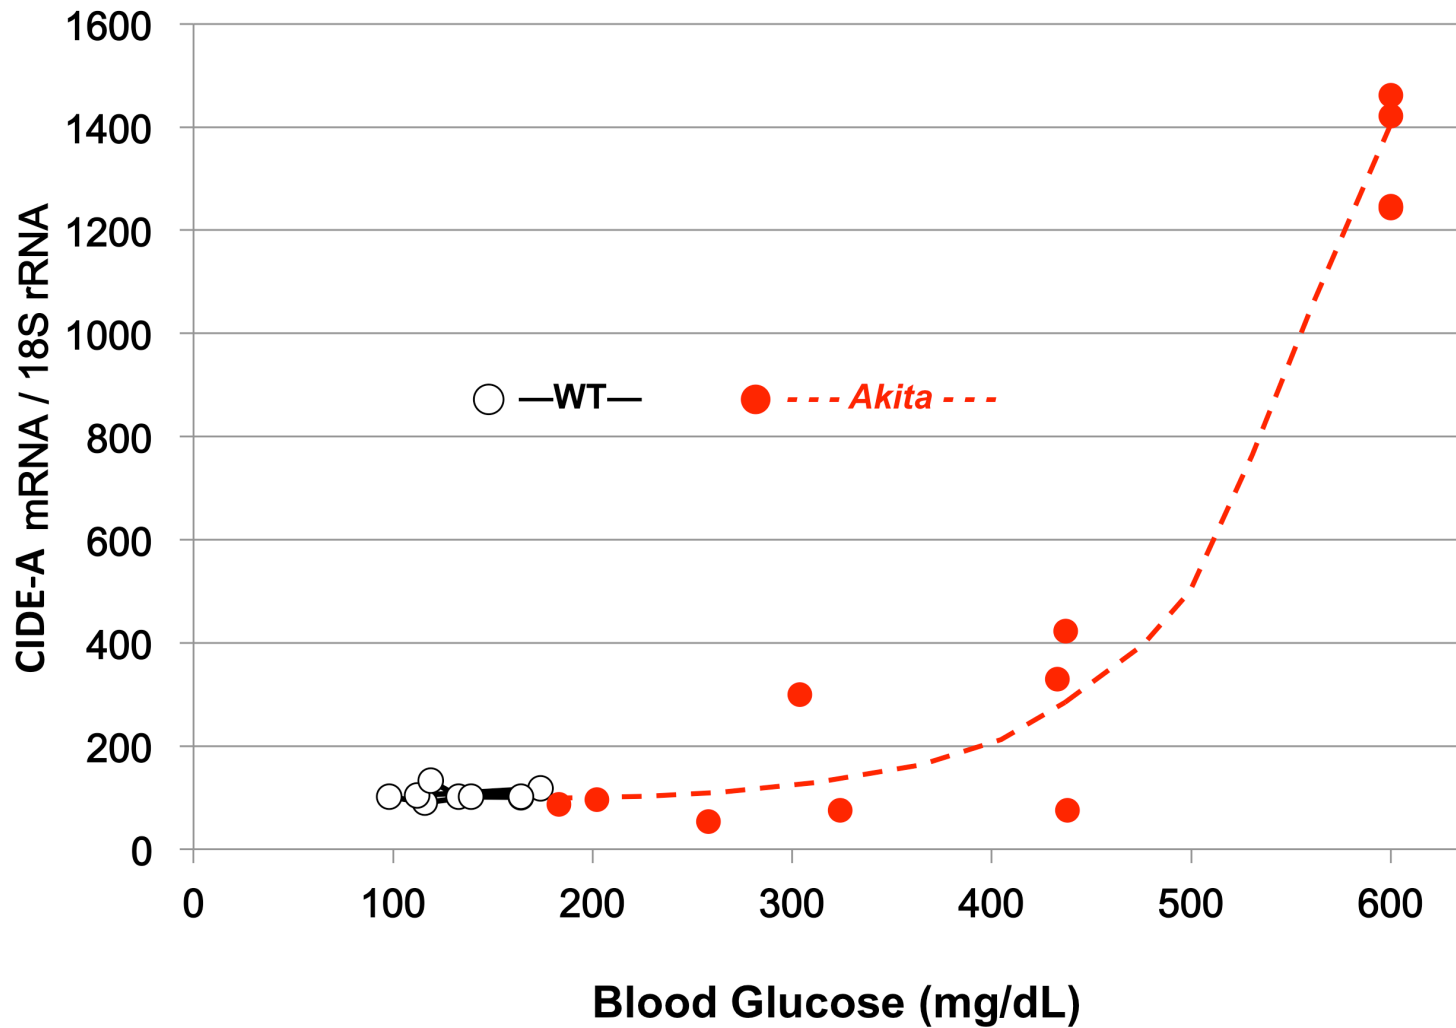

**Figure S7. CIDE-A mRNA levels in *Akita* mouse pancreatic islets as a function of progressive dysglycemia.** Islets were isolated from male wild-type and *Akita* mice that reflect progression based on random blood glucose. Each point represents a different animal, with CIDE-A mRNA levels normalized to ribosomal 18S RNA.
